# Supplementary material for: Synthesis and characterization of holmium based metal–organic frameworks
Source: Royal Society of Chemistry journal article supplement (doi:10.1039/d4ce00592a), 2024-01-01
Supplement: d4ce00592a1.pdf [file d4ce00592a1.pdf]

## Synthesis and Characterization of Holmium Based Metal-Organic Frameworks

Muhammad Abbas <sup>1</sup>, Murtaza Degani <sup>1</sup>, Simin Sheybani <sup>1</sup>, Tejas Shah <sup>1</sup>, Monu Joy <sup>1</sup>, and Kenneth J. Balkus Jr. <sup>1,\*</sup>

<sup>1</sup>Department of Chemistry and Biochemistry, The University of Texas at Dallas, 800 West Campbell Rd, Richardson, TX 75080, United States

\*Correspondence: Kenneth J. Balkus Jr, email: [balkus@utdallas.edu](mailto:balkus@utdallas.edu)

### Single crystal X-ray diffraction (SC-XRD)

Single crystal X-ray diffraction data for both compounds was collected on a Bruker D8-QUEST X-ray diffractometer equipped with a Mo  $\mu$ S microfocus X-ray source ( $\lambda = 0.71073 \text{ \AA}$ ) and a PHOTON II CPAD detector. The measurement was performed at 200 K using an Oxford Cryosystems low-temperature device. The APEX-IV software suite was used for data collection, cell refinement, and data reduction. Absorption corrections were applied using SADABS.<sup>1</sup> Space group assignments were determined by examination of systematic absences, E-statistics, and successive refinement of the structures. The structure was solved with dual-space method using SHELXT<sup>2</sup> and refined against  $|F|^2$  on all data by full-matrix least squares with SHELXL.<sup>3</sup> All non-hydrogen atoms were refined with anisotropic displacement parameters. The C-H atoms were positioned with idealized geometry and were refined with fixed isotropic displacement parameters [ $U_{\text{eq}}(\text{H}) = -1.2U_{\text{eq}}(\text{C}), -1.5U_{\text{eq}}(\text{C})$  for  $-\text{CH}_3$ ] using a riding model. CCDC 2356198–2356199 contains the supplementary crystallographic data for this paper. These data can be obtained free of charge from the Cambridge Crystallographic Data Centre via [www.ccdc.cam.ac.uk](http://www.ccdc.cam.ac.uk). Selected crystal data and details on structure determinations are listed in Table S1.

### X-ray Photoelectron Spectroscopy (XPS)

X-ray photoelectron spectra were collected on a PHI VersaProbe II Scanning XPS Microprobe (Physical Electronics Inc, Chanhassen, Minnesota) equipped with Al K $\alpha$  X-ray source ( $E_p = 1486.7$  eV) at a pressure  $1.6 \times 10^{-9}$  Torr. The high-resolution spectra were collected at the pass energy of 23.5 eV with a step size of 0.2 eV. Photoelectron spectra were obtained using a charge compensation of 2  $\mu$ A. The sample surface was cleaned by sputtering Gas-Cluster Ion Beam (GCIB) with an energy of 5 kV and cluster size of  $\sim 2500$  argon atoms. The data was processed with software CasaXPS and binding energies were doubly calibrated to adventitious C $_{1s}$  at 284.8 eV and Au 4f $_{7/2}$  at 83.95 eV.

### **Powder X-ray diffraction (PXRD)**

PXRD patterns were collected on an Ultima IV X-ray diffractometer (Rigaku) equipped with Cu K $\alpha$  radiation, with a scan rate of 2 $^\circ$ /min and a step size of 0.04 $^\circ$ . The simulated XRD patterns were generated from the CIF files using a crystal structure visualization tool Mercury<sup>9</sup> (Cambridge Crystallographic Data Centre).

### **Gas Adsorption Analysis and Sample Preparation**

The adsorption/desorption isotherms were obtained on ASAP 2020 Plus (Micromeritics instrument corporation) at 77 K for N $_2$  and 273 K for CO $_2$ . For the surface area and porosity analysis, MOFs crystals were washed 3 times with fresh DMF and activated at 170 $^\circ$ C under vacuum. The surface area was calculated by built-in Brunauer–Emmett–Teller (BET) model. Ultra-high purity CO $_2$  and N $_2$  were used for the analysis.

### **The scanning electron microscopy (SEM) and Energy Dispersive X-ray Spectroscopy (EDX)**

SEM and EDX was performed on a Zeiss EVO LS SEM and an Aztec Instruments Oxford EDX

### **Thermogravimetric analysis (TGA)**

Thermogravimetric analysis was conducted using a SDT Q600 (TA Instruments). The samples were then heated from room temperature to 700 °C at a rate of 10 °C/min under air with a flow rate of 20 mL/min.

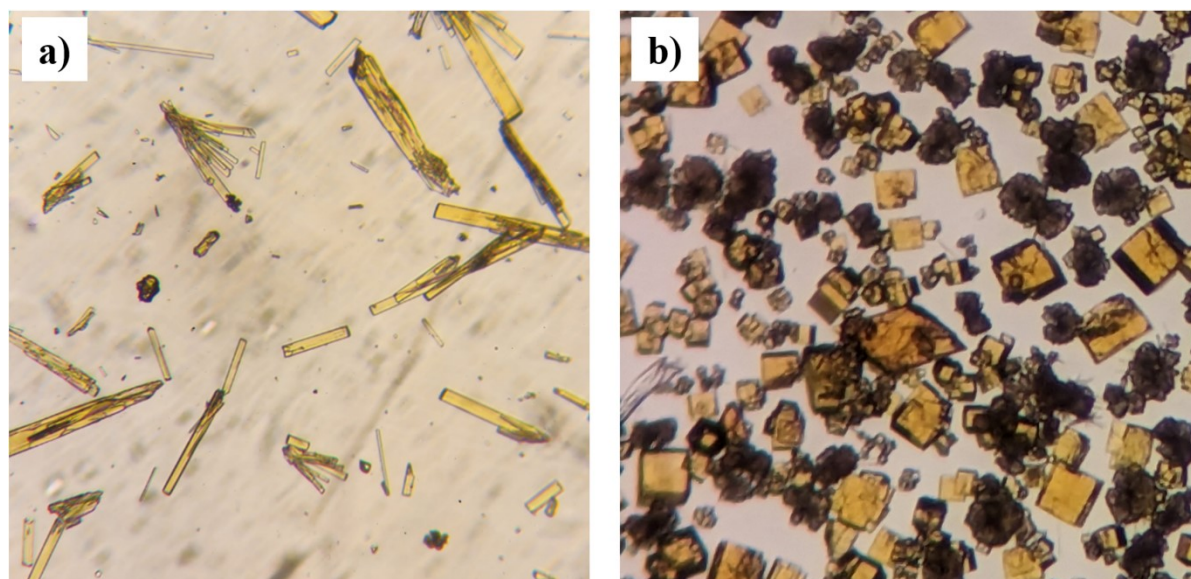

Figure S1. Optical Images of crystals of the (a)  $Ho_2$ -abtc and (b)  $Ho_6$ -abtc.

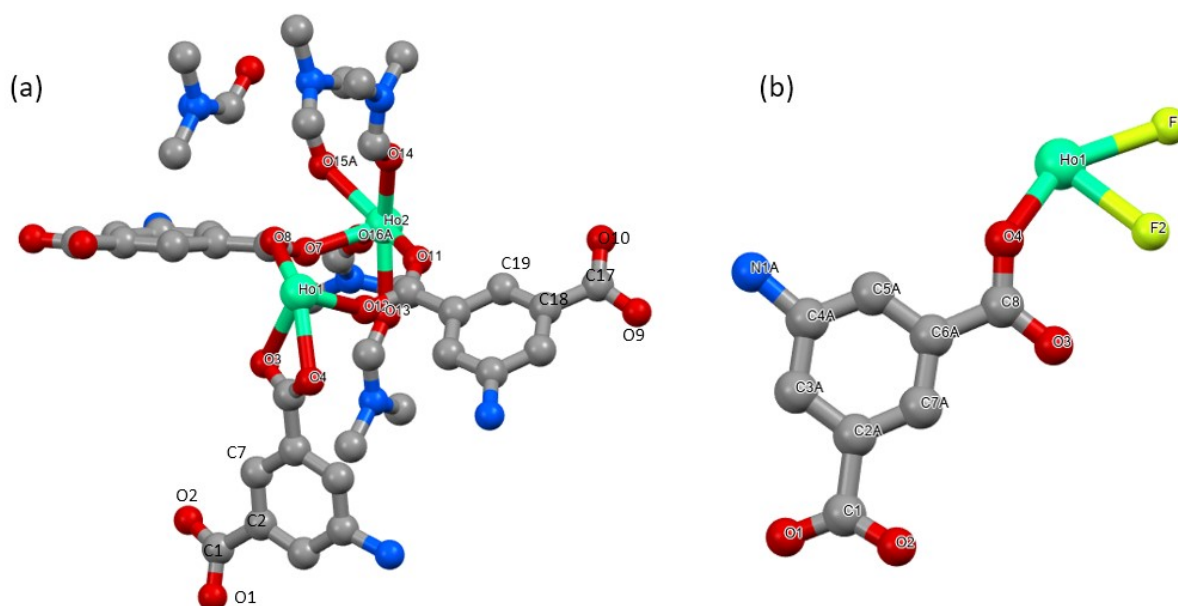

Figure S2. Asymmetric units of (a)  $Ho_2$ -abtc and (b)  $Ho_6$ -abtc.

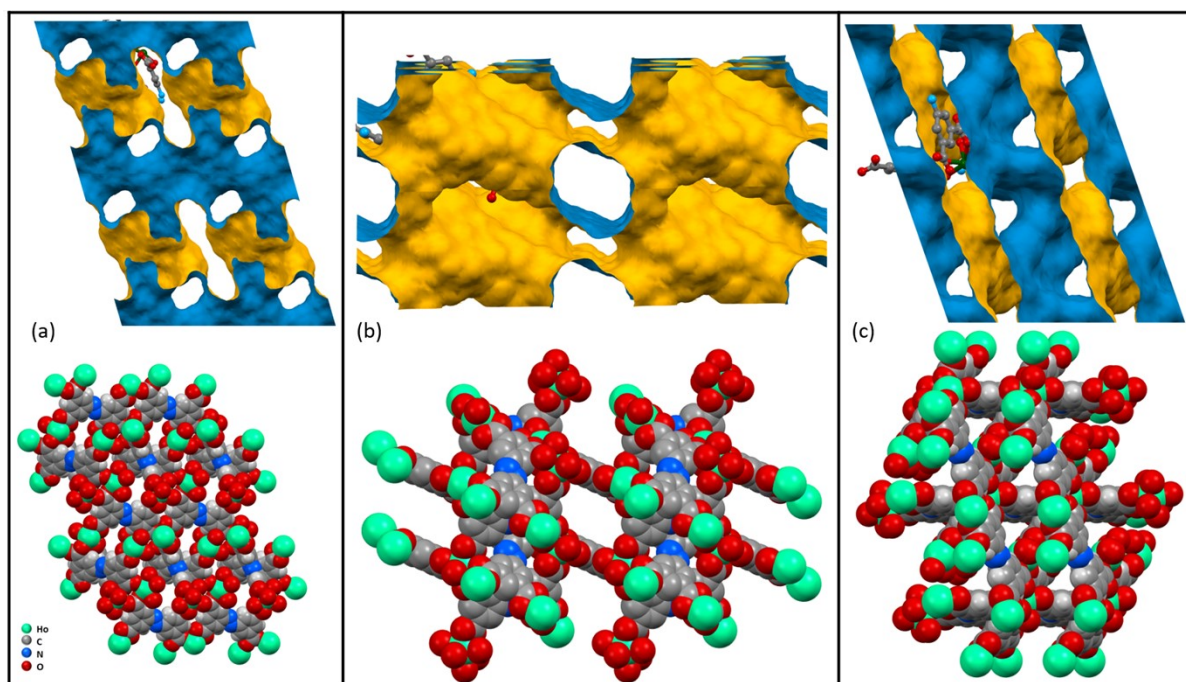

Figure S3. Solvent accessible surface and corresponding channels of the  $Ho_2$ -abtc along the  $a$ ,  $b$ , and  $c$ -axis (outer surface = yellow, inner surface = blue).

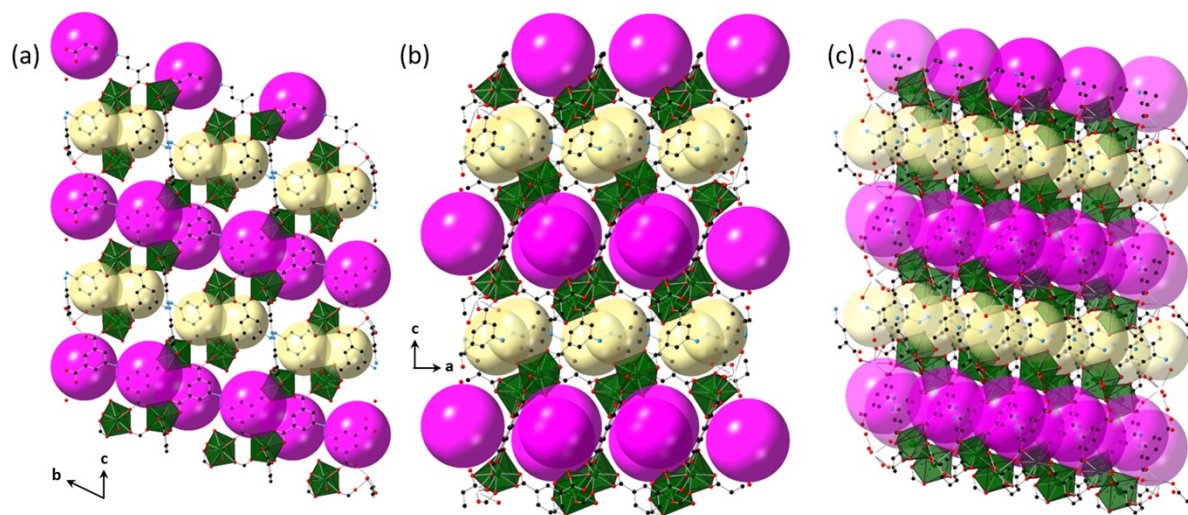

Figure S4. Crystal structure packing of the  $Ho_2$ -abtc along the  $a$ ,  $b$ , and  $[100]$  directions.



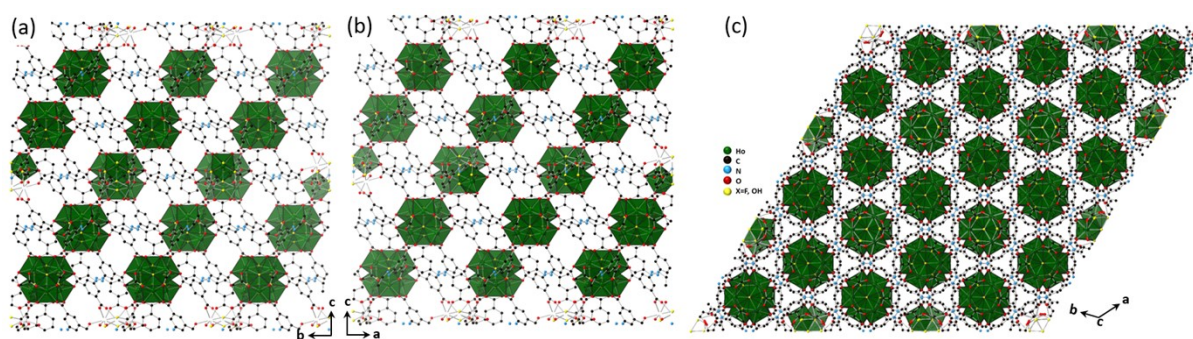

Figure S5. Crystal structure packing of the  $\text{Ho}_6\text{-abtc}$  along the  $a$ ,  $b$ , and  $c$  axes.

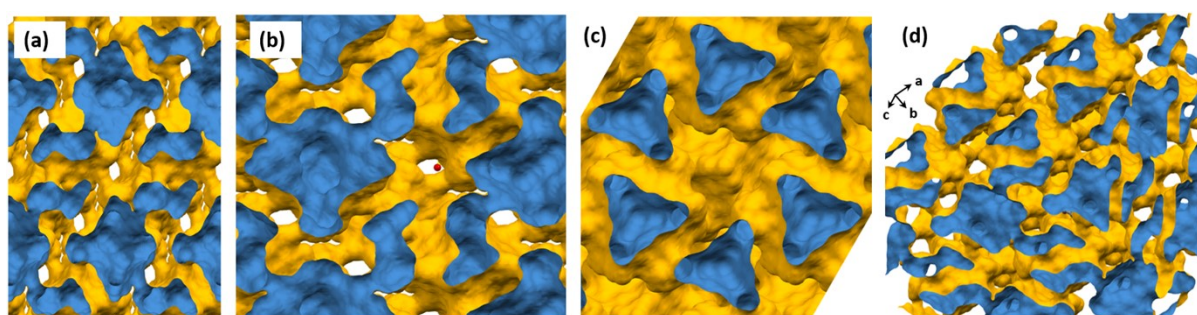

Figure S6.. Solvent accessible surface of the  $\text{Ho}_6\text{-abtc}$  along the  $a$ ,  $b$ , and  $c$ -axis (outer surface = yellow, inner surface = blue).

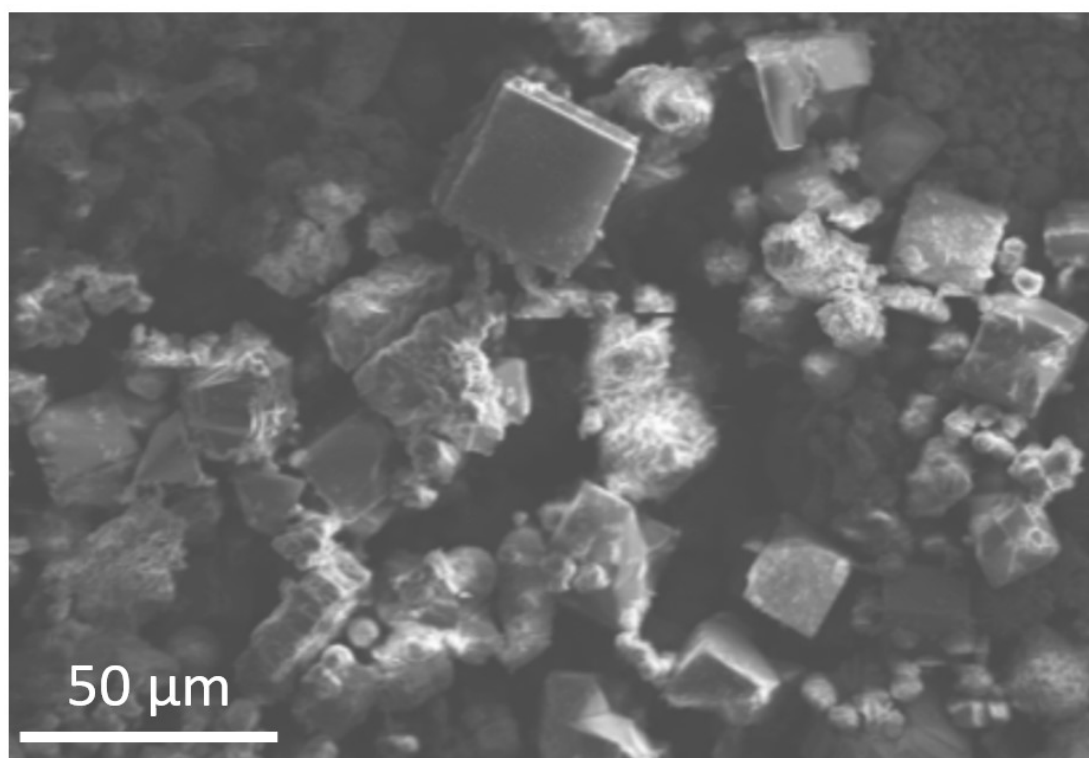

Figure S7. SEM image of the  $\text{Ho}_6\text{-abtc}$ .

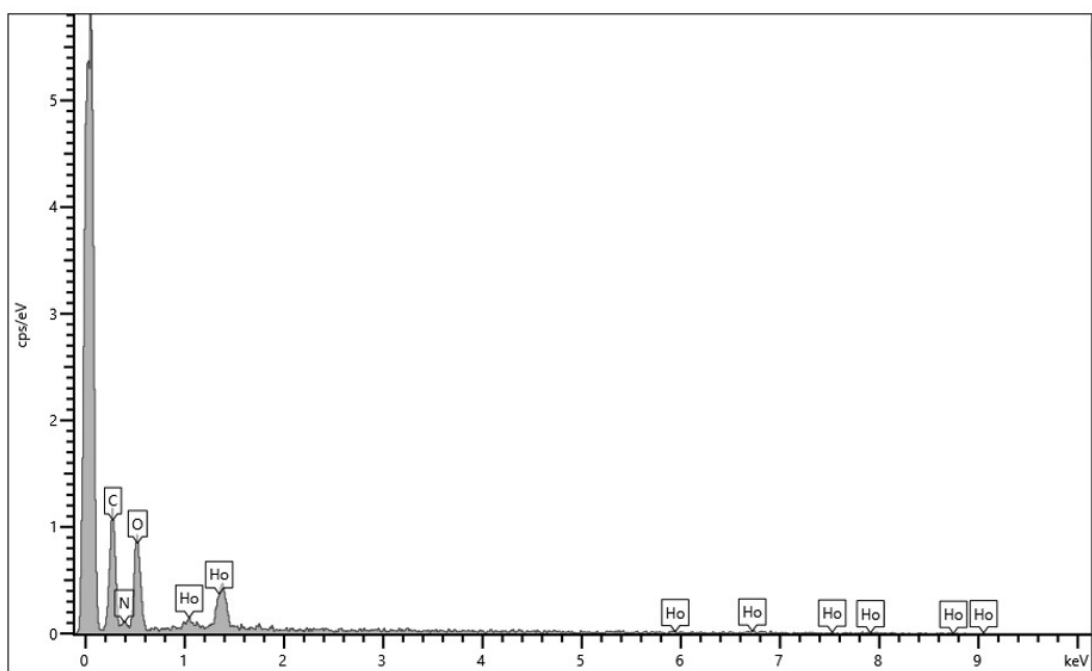

Figure S8. EDS spectrum of the  $Ho_2-abtc$ .

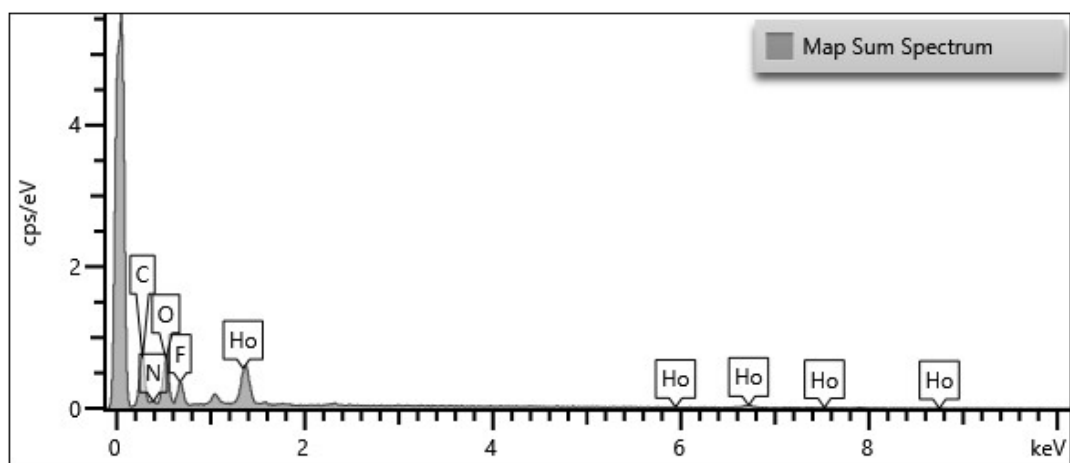

Figure S9. EDS spectrum of the  $Ho_6-abtc$ .

Table S1. EDS map sum spectrum of the Ho<sub>2</sub>-abtc.

| Element       | Line Type | Apparent Concentration | k Ratio | Wt%    | Wt% Sigma | Standard Label   |
|---------------|-----------|------------------------|---------|--------|-----------|------------------|
| C             | K series  | 0.04                   | 0.00037 | 42.63  | 6.63      | C Vit            |
| N             | K series  | 0.02                   | 0.00003 | 7.68   | 2.88      | BN               |
| O             | K series  | 0.04                   | 0.00015 | 25.49  | 4.05      | SiO <sub>2</sub> |
| Ho            | L series  | 0.02                   | 0.00018 | 24.20  | 11.40     | Ho (v)           |
| <b>Total:</b> |           |                        |         | 100.00 |           |                  |

Table S2. EDS map sum spectrum of the Ho<sub>6</sub>-abtc.

| Element       | Line Type | Apparent Concentration | k Ratio | Wt%    | Wt% Sigma | Standard Label   |
|---------------|-----------|------------------------|---------|--------|-----------|------------------|
| C             | K series  | 0.02                   | 0.00023 | 25.7   | 1.89      | C Vit            |
| N             | K series  | 0.01                   | 0.00002 | 3.2    | 0.73      | BN               |
| O             | K series  | 0.03                   | 0.00011 | 12.90  | 0.94      | SiO <sub>2</sub> |
| F             | K series  | 0.03                   | 0.00006 | 4.4    | 0.52      | CaF <sub>2</sub> |
| Ho            | L series  | 0.05                   | 0.00054 | 53.8   | 3.30      | Ho (v)           |
| <b>Total:</b> |           |                        |         | 100.00 |           |                  |

Table S3. Percent composition of Ho<sub>6</sub>-abtc calculated from the survey XPS spectrum.

| Element | RSF   | FWHM  | Raw Area | Atomic% | Weight% |
|---------|-------|-------|----------|---------|---------|
| Ho 4d   | 13.35 | 10.10 | 76613.79 | 6.53    | 46.84   |
| C 1s    | 1.0   | 4.22  | 60098.46 | 68.32   | 35.69   |
| N 1s    | 1.8   | 2.82  | 4579.76  | 2.89    | 1.76    |
| O 1s    | 2.93  | 4.28  | 52955.87 | 20.50   | 14.26   |
| F 1s    | 4.43  | 4.07  | 6869.70  | 1.76    | 1.45    |

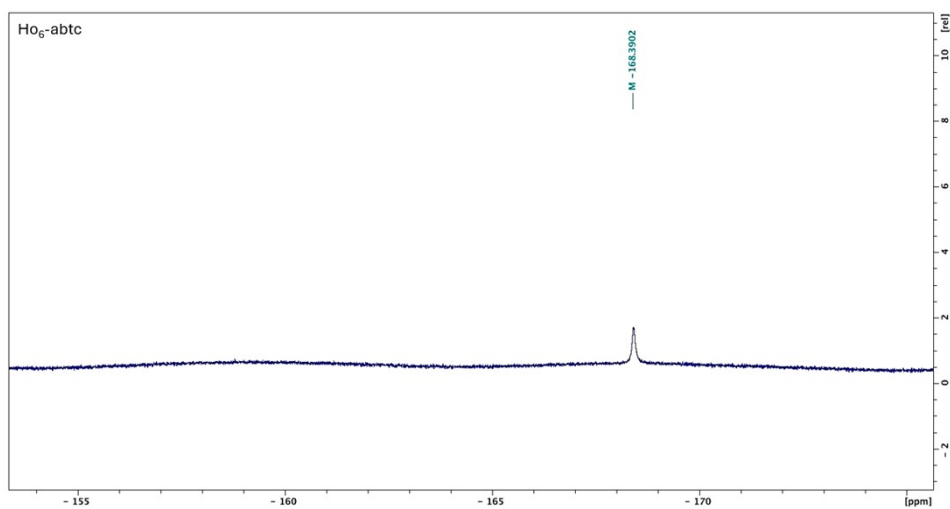

Figure S10. The  $^{19}\text{F}$ -NMR spectra of the acid digested  $\text{Ho}_6\text{-abtc}$  MOF exhibiting a peak at -168.39 for HF.

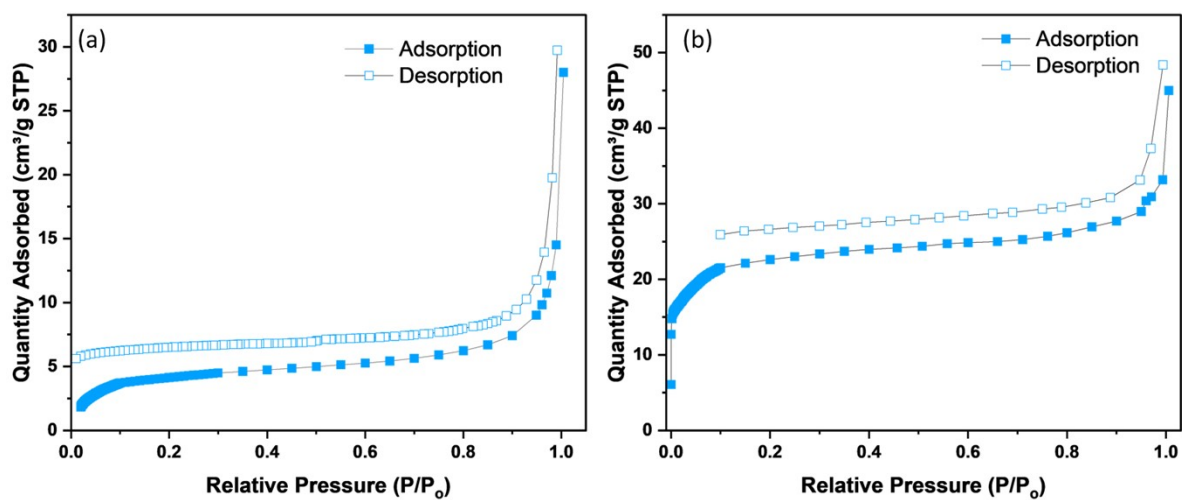

Figure S11. Nitrogen adsorption-desorption isotherms at 77 K for (a)  $\text{Ho}_2\text{-abtc}$  and (b)  $\text{Ho}_6\text{-abtc}$ .

## References

1. Bruker (2001) SADABS Bruker AXS Inc., Madison, Wisconsin, USA
2. G. M. Sheldrick, Acta Cryst A **2015**, 71, 3–8.
3. G. M. Sheldrick, Acta Cryst C **2015**, 71, 3–8.
